# Supplementary material
Source: bioRxiv or medRxiv preprint supplement (https://www.biorxiv.org/highwire/filestream/101127/field_highwire_adjunct_files/2/331587-11.pdf)
Supplement: Supplementary file [file 331587-11.pdf]

# A congenital pain insensitivity mutation in the nerve growth factor gene uncouples nociception from affective pain in heterozygous humans and mice

Giovanna Testa<sup>1</sup>, Irene Perini<sup>2</sup>, Marco Mainardi<sup>1</sup>, Chiara Morelli<sup>3</sup>, Francesco Olimpico<sup>1</sup>, Laura Pancrazi<sup>1,4</sup>, Carla Petrella<sup>5</sup>, Cinzia Severini<sup>5</sup>, Rita Florio<sup>7</sup>, Francesca Malerba<sup>7</sup>, Paul Heppenstall<sup>3</sup>, Mario Costa<sup>4</sup>, India Morrison<sup>2\*</sup>, Simona Capsoni<sup>1,6\*</sup> and Antonino Cattaneo<sup>1,7\*</sup>

<sup>1</sup> Bio@SNS Laboratory, Scuola Normale Superiore, Pisa, Italy

<sup>2</sup> Department of Clinical and Experimental Medicine, Linköping University, Linköping, Sweden

<sup>3</sup> EMBL Rome, Monterotondo, Italy

<sup>4</sup> Institute of Neuroscience, CNR, Pisa, Italy

<sup>5</sup> Institute of Cell Biology and Neurobiology, CNR, Rome, Italy

<sup>6</sup> Institute of Human Physiology, Department of Medical and Surgical Specialties Sciences, Ferrara, Italy

<sup>7</sup> Neurotrophins and Neurodegenerative Diseases Laboratory, Rita Levi-Montalcini European Brain Research Institute, Rome, Italy.

\* joint corresponding authors

## Figure 1

- a. Capsaicin test 2 months, ANOVA-1 ( $F_{2,12} = 12.869$ ,  $p = 0.002$ ), followed by Bonferroni post-hoc test (NGF<sup>m/m</sup> vs. DMSO,  $p = 0.002$ ; NGF<sup>m/m</sup> vs. NGF<sup>R100W/m</sup>,  $p = 0.017$ ; HT<sup>R100W</sup> vs. DMSO, NS). DMSO,  $n = 3$ ; NGF<sup>m/m</sup>,  $n = 5$ ; NGF<sup>R100W/m</sup>,  $n = 5$ . Capsaicin test 6 months, ANOVA-1 ( $F_{2,13} = 49.995$ ,  $p < 0.001$ ), followed by Bonferroni post-hoc test (NGF<sup>m/m</sup> vs. DMSO,  $p < 0.001$ ; NGF<sup>m/m</sup> vs. NGF<sup>R100W/m</sup>,  $p < 0.001$ ; NGF<sup>R100W/m</sup> vs. DMSO,  $p = 0.017$ ). DMSO,  $n = 3$ ; NGF<sup>m/m</sup>,  $n = 5$ ; NGF<sup>R100W/m</sup>,  $n = 6$ .
- b. Hotplate test 2 months, Student's two-tailed  $t$ -test ( $t = 0.126$ ,  $p = 0.901$ ). NGF<sup>m/m</sup>,  $n = 11$ ; NGF<sup>R100W/m</sup>,  $n = 15$ . Hotplate test 6 months, Student's two-tailed  $t$ -test ( $t = 4.743$ ,  $p < 0.001$ ). NGF<sup>m/m</sup>,  $n = 4$ ; NGF<sup>R100W/m</sup>,  $n = 9$ .
- c. Acetone test 2 months, Student's two-tailed  $t$ -test ( $t = 2.445$ ,  $p = 0.035$ ). NGF<sup>m/m</sup>,  $n = 6$ ; NGF<sup>R100W/m</sup>,  $n = 6$ . Acetone test 6 months, Student's  $t$ -test two-tailed ( $t = 2.457$ ,  $p = 0.026$ ). NGF<sup>m/m</sup>,  $n = 8$ ; NGF<sup>R100W/m</sup>,  $n = 10$ .
- d. Tape removal test 2 months, Student's two-tailed  $t$ -test ( $t = 1.261$ ,  $p = 0.226$ ). NGF<sup>m/m</sup>,  $n = 6$ ; NGF<sup>R100W/m</sup>,  $n = 11$ . Tape removal test 6 months, Student's two-tailed  $t$ -test ( $t = 2.305$ ,  $p = 0.042$ ). NGF<sup>m/m</sup>,  $n = 5$ ; NGF<sup>R100W/m</sup>,  $n = 8$ .
- e. Cotton swab test 2 months, Student's two-tailed  $t$ -test ( $t = 0.155$ ,  $p = 0.879$ ). NGF<sup>m/m</sup>,  $n = 5$ ; NGF<sup>R100W/m</sup>,  $n = 11$ . Acetone test 6 months, Student's two-tailed  $t$ -test ( $t = 0.050$ ,  $p = 0.961$ ). NGF<sup>m/m</sup>,  $n = 8$ ; NGF<sup>R100W/m</sup>,  $n = 7$ .
- f. Capsaicin test on mice treated with NGF from gestation until P60, Student's two-tailed  $t$ -test ( $t = 0.323$ ,  $p = 0.754$ ). saline,  $n = 5$ ; NGF<sup>m/m</sup>,  $n = 7$ ; NGF<sup>R100W/m</sup>, Student's two-tailed  $t$ -test ( $t = 2.764$ ,  $p = 0.033$ ). saline,  $n = 5$ , NGF,  $n = 4$ .
- h. Nerve conduction velocity, A $\beta$  fiber peak, Student's two-tailed  $t$  test ( $t = 0.435$ ,  $p = 0.669$ ); A $\delta$  fiber peak, Student's two-tailed  $t$  test ( $t = 0.737$ ,  $p = 0.470$ ); C fiber peak, Student's two-tailed  $t$  test ( $t = 1.629$ ,  $p = 0.120$ ); non-significant; NGF<sup>m/m</sup>,  $n = 10$ ; NGF<sup>R100W/m</sup>,  $n = 11$  nerves.
- i. PGP9.5 immunofluorescence in glabrous skin, 2 months, Student's two-tailed  $t$  test ( $t = 0.792$ ,  $p = 0.473$ );  $n = 3$  for both groups. 6 months, Student's two-tailed  $t$  test ( $t = 5.800$ ,  $p = 0.002$ ); NGF<sup>m/m</sup>,  $n = 4$ ; NGF<sup>R100W/m</sup>,  $n = 3$ .
- j. NGF immunofluorescence in glabrous skin, Student's two-tailed  $t$  test ( $t = 3.169$ ,  $p = 0.034$ );  $n = 3$  for both groups.

**Figure 2**

- a. Hyperalgesic response to intraplantar NGF injection, ANOVA-2 repeated measures (treatment  $\times$  time interaction,  $F_{8,144} = 5.785$ ,  $p < 0.001$ ) followed by Bonferroni post-hoc test, hNGF<sup>WT</sup> vs. saline, \*\*\*  $p < 0.001$ ; hNGF<sup>WT</sup> vs. hNGF<sup>R100W</sup>, ###  $p < 0.001$ , #  $p = 0.002$ ; saline,  $n = 10$ ; hNGF<sup>WT</sup>,  $n = 11$ ; hNGF<sup>R100W</sup>,  $n = 9$ .
- b. B2R expression in DRG cultures after incubation with NGF and bradykinin, ANOVA-2 (NGF  $\times$  bradykinin interaction,  $F_{2,45} = 3.371$ ,  $p = 0.044$ ) followed by Bonferroni post-hoc test, \*\*\*  $p < 0.001$ ; hNGF<sup>WT</sup>-vehicle,  $n = 7$ ; hNGF<sup>R100W</sup>-vehicle,  $n = 8$ ; control-vehicle,  $n = 8$ ; hNGF<sup>WT</sup>-bradykinin,  $n = 8$ ; hNGF<sup>R100W</sup>-bradykinin,  $n = 7$ ; control-bradykinin,  $n = 8$ .
- c. TRPV1 phosphorylation in DRG cultures after incubation with hNGF and bradykinin, ANOVA-2 (NGF  $\times$  bradykinin interaction,  $F_{2,47} = 9.346$ ,  $p < 0.001$ ) followed by Bonferroni post-hoc test, \*\*\*  $p < 0.001$ , \*\*  $p = 0.008$ , \*  $p = 0.02$ ;  $n = 8$  for each group.
- d. Substance P release in DRG cultures in response to hNGF treatment, ANOVA-1 ( $F_{2,16} = 10.501$ ,  $p < 0.002$ ) followed by Student-Newman-Keuls post-hoc test, \*\*\*  $p < 0.001$ , \*  $p = 0.03$ ; hNGF<sup>WT</sup>,  $n = 5$ ; hNGF<sup>R100W</sup>,  $n = 6$ ; control,  $n = 6$ .
- e. *Left*, B2R immunofluorescence in DRGs, Student's two-tailed  $t$  test ( $t = 6.219$ ,  $p = 0.003$ ); NGF<sup>m/m</sup>,  $n = 3$ ; NGF<sup>R100W/m</sup>,  $n = 3$ . *Right*, TRPV1 immunofluorescence in DRGs, Student's two-tailed  $t$  test ( $t = 12.455$ ,  $p < 0.001$ ); NGF<sup>m/m</sup>,  $n = 4$ ; NGF<sup>R100W/m</sup>,  $n = 4$ .
- f. Morris Water Maze, latency to reach the platform, ANOVA-2 with repeated measures (main effect of "training day",  $F_{8,112} = 15.600$ ,  $p < 0.001$ ). NGF<sup>m/m</sup>,  $n = 5$ ; NGF<sup>R100W/m</sup>,  $n = 8$ .
- g. Morris Water Maze, latency to reach the platform, ANOVA-2 with repeated measures ("training day"  $\times$  "genotype" interaction,  $F_{8,123} = 2.836$ ,  $p = 0.007$ ), followed by Bonferroni post-hoc test, \*  $p < 0.05$ , \*\*\*  $p < 0.001$ . mNGF<sup>+/+</sup>,  $n = 7$ ; mNGF<sup>+/-</sup>,  $n = 7$ .
- h. Object Recognition test - sample phase, 2 months, Student's two-tailed  $t$  test ( $t = 0.385$ ,  $p = 0.704$ ). NGF<sup>m/m</sup>,  $n = 7$ ; NGF<sup>R100W/m</sup>,  $n = 15$ ; 6 months, Student's  $t$  two-tailed test ( $t = 2.083$ ,  $p = 0.058$ ). NGF<sup>m/m</sup>,  $n = 9$ ; NGF<sup>R100W/m</sup>,  $n = 6$ ; Student's two-tailed  $t$  test ( $t = 2.014$ ,  $p = 0.215$ ). mNGF<sup>+/+</sup>,  $n = 6$ ; mNGF<sup>+/-</sup>,  $n = 9$ .
- i. Object Recognition test - test phase, 2 months, ANOVA-2 (main effect of "object",  $F_{1,43} = 19.916$ ,  $p < 0.001$ ), NGF<sup>m/m</sup>,  $n = 7$ ; NGF<sup>R100W/m</sup>,  $n = 15$ . 6 months, ANOVA-2 (main effect of "object",  $F_{1,27} = 19.327$ ,  $p = 0.002$ ), NGF<sup>m/m</sup>,  $n = 9$ ; NGF<sup>R100W/m</sup>,  $n = 5$ ; ANOVA-2 ("genotype"  $\times$  "object" interaction,  $F_{1,29} = 4.664$ ,  $p = 0.040$ ) followed by Bonferroni post-hoc test (mNGF<sup>+/+</sup>, new object vs. old object,  $p = 0.018$ ; new object, mNGF<sup>+/+</sup> vs. mNGF<sup>+/-</sup>,  $p = 0.012$ ); mNGF<sup>+/+</sup>,  $n = 6$ ; mNGF<sup>+/-</sup>,  $n = 9$ .
- j. ChAT expression, medial septum, 2 months, Student's two-tailed  $t$ -test ( $t = 0.958$ ,  $p = 0.375$ ). NGF<sup>m/m</sup>,  $n = 4$ ; NGF<sup>R100W/m</sup>,  $n = 4$ ; 6 months, Student's two-tailed  $t$ -test ( $t = 1.271$ ,  $p = 0.278$ ; WT,  $n = 3$ ; HT<sup>R100W</sup>,  $n = 4$ ); Student's two-tailed  $t$ -test ( $t = 3.529$ ,  $p = 0.010$ ; mNGF<sup>+/+</sup>,  $n = 5$ ; mNGF<sup>+/-</sup>,  $n = 4$ ).

**Figure 3**

- a. *Left*, current thresholds for fear conditioning, 2 months, ANOVA-2 ("genotype"  $\times$  "response" interaction,  $F_{3,57} = 10.113$ ,  $p < 0.001$ ), followed by Bonferroni post-hoc test, \*\*\*  $p < 0.001$ , \*\*  $p = 0.007$ , \*  $p = 0.021$ ; NGF<sup>h/m</sup>,  $n = 11$ ; NGF<sup>R100W/m</sup>,  $n = 9$ . *Middle*, current thresholds for fear conditioning, 6 months, ANOVA-2 (main effect of "response",  $F_{3,48} = 84.172$ ,  $p < 0.001$ ); NGF<sup>h/m</sup>,  $n = 10$ ; NGF<sup>R100W/m</sup>,  $n = 3$ .
- b. Cued fear conditioning, 2 months, Student's two-tailed  $t$  test ( $t = 2.348$ ,  $p = 0.037$ ); NGF<sup>h/m</sup>,  $n = 10$ ; NGF<sup>R100W/m</sup>,  $n = 4$ ; 6 months, Student's two-tailed  $t$  test ( $t = 10.190$ ,  $p < 0.001$ ); NGF<sup>h/m</sup>,  $n = 10$ ; NGF<sup>R100W/m</sup>,  $n = 9$ .
- c. Contextual fear conditioning, 6 months, ANOVA-2 ("genotype"  $\times$  "phase" interaction,  $F_{1,22} = 436.453$ ,  $p < 0.001$ ) followed by Bonferroni post-hoc test, \*\*\*  $p < 0.001$ ; NGF<sup>h/m</sup>,  $n = 6$ ; NGF<sup>R100W/m</sup>,  $n = 5$ .
- d. c-Fos immunohistochemistry, 6 months, *upper row, left*, amygdala, Student's two-tailed  $t$  test ( $t = 4.235$ ,  $p = 0.003$ ); NGF<sup>h/m</sup>,  $n = 4$ ; NGF<sup>R100W/m</sup>,  $n = 6$ ; *middle left*, hippocampus, Student's two-tailed  $t$  test ( $t = 2.485$ ,  $p = 0.038$ ); NGF<sup>h/m</sup>,  $n = 4$ ; NGF<sup>R100W/m</sup>,  $n = 6$ ; *middle*, motor cortex, Student's two-tailed  $t$  test ( $t = 12.226$ ,  $p < 0.001$ ); NGF<sup>h/m</sup>,  $n = 3$ ;

NGF<sup>R100W/m</sup>,  $n = 4$ ; *middle right*, anterior cingulate cortex (ACC), Student's two-tailed  $t$  test ( $t = 2.349$ ,  $p = 0.047$ ; NGF<sup>h/m</sup>,  $n = 4$ ; NGF<sup>R100W/m</sup>,  $n = 6$ ); *right*, caudate nucleus, Student's two-tailed  $t$  test ( $t = 3.026$ ,  $p = 0.039$ ); NGF<sup>h/m</sup>,  $n = 3$ ; NGF<sup>R100W/m</sup>,  $n = 3$ ; *lower row*; primary somatosensory cortex (S1), Student's  $t$  two-tailed test ( $t = 0.526$ ,  $p = 0.621$ ); NGF<sup>h/m</sup>,  $n = 3$ ; NGF<sup>R100W/m</sup>,  $n = 4$ .

- e. Predator test, 6 months, *left*, Student's paired  $t$  test ( $t = 3.344$ ,  $p = 0.012$ ); NGF<sup>h/m</sup>,  $n = 8$ ; *middle left*, Student's paired  $t$  test ( $t = 21.847$ ,  $p < 0.001$ ); NGF<sup>R100W/m</sup>,  $n = 7$ ; *middle right*, Student's paired  $t$  test ( $t = 4.117$ ,  $p = 0.004$ ); NGF<sup>h/m</sup>,  $n = 8$ ; *right*, Student's paired  $t$  test ( $t = 25.711$ ,  $p < 0.001$ ); NGF<sup>R100W/m</sup>,  $n = 7$ .
- f. c-Fos immunohistochemistry, hypothalamic VMH, Student's two-tailed  $t$  test ( $t = 0.243$ ,  $p = 0.815$ ); NGF<sup>h/m</sup>,  $n = 4$ ; NGF<sup>R100W/m</sup>,  $n = 5$ .
- g. Oxytocin immunohistochemistry, 6 months, hypothalamic PVA, ANOVA-2 (main effect of "genotype",  $F_{1,18} = 19.464$ ,  $p < 0.001$ ), NGF<sup>h/m</sup>-baseline,  $n = 4$ ; NGF<sup>R100W/m</sup>-baseline,  $n = 7$ ; NGF<sup>h/m</sup>-fear conditioning,  $n = 3$ ; NGF<sup>R100W/m</sup>-fear conditioning,  $n = 5$ .

#### Figure 4

- a. Thresholds. Mann-Whitney U test between R100W carriers ( $N=3$ ) and healthy participants ( $N=18$ ). No significant difference. ( $U=25.5$ ,  $p=0.8$  for hot,  $U=16$ ,  $p=0.3$  for cold,  $U=19.5$ ,  $p=0.4$  for warm,  $U=17.5$ ,  $p=0.3$  for cool).
- b. Urge to move ratings. Mann-Whitney U test on slopes from fitted curves between R100W carriers ( $N=12$ ) and age-matched controls ( $N=12$ ) ( $U=31$ ,  $p=0.01$  for hot,  $U=12$  for warm). Mann-Whitney U test on the final VAS rating between R100W carriers ( $N=12$ ) and age-matched controls ( $N=12$ ) ( $U=23$ ,  $p=0.005$  for hot;  $U=55$ ,  $p = 0.3$  for warm).
- c. Painful situation estimation. Mann-Whitney U test on R100W carriers ( $N=3$ ) and age-matched controls ( $N=18$ ), hits ( $U=1$ ,  $p = 0.006$ ), misses ( $U=1$ ,  $p = 0.006$ ), and false alarms ( $U=3$ ,  $p = 0.13$ ).
- d.  $\beta$  values primary motor cortex (M1). Controls. ANOVA-3 repeated measures (pain (pain, innocuous), temperature (heat, cold), and task (movement, no-movement), ( $F_{1,17} = 7.78$ ,  $p = 0.01$ ) temperature x task interaction. ANOVA-2 repeated measures (temperature x task) separately for movement ( $F = 8.83$ ,  $p = 0.009$  temperature x pain interaction) and no-movement conditions (main effect of "pain"  $F = 39.5$ ,  $p = 0.0000008$ , followed by post-hoc test;  $p = 0.001$  painful heat > painful cold). Carriers. No significant effects.
- e.  $\beta$  values right striatum. Controls. ANOVA-3 repeated measures (pain (pain, innocuous), temperature (heat, cold), and task (movement, no-movement), ( $F_{1,12} = 12.93$ ,  $p = 0.002$ ) task x pain interaction. ANOVA-2 repeated measures (temperature x task) separately for movement and no-movement conditions (main effect of "temperature"  $F = 9.23$ ,  $p = 0.007$ , followed by post-hoc test;  $p = 0.01$  painful heat > painful cold,  $p = 0.03$  innocuous heat > innocuous cold). Carriers. No significant effects.
- f.  $\beta$  values left striatum. Controls. ANOVA-3 repeated measures (pain (pain, innocuous), temperature (heat, cold), and task (movement, no-movement), ( $F_{1,17} = 7.112$ ,  $p = 0.016$ ) task x pain interaction. ANOVA-2 repeated measures (temperature x task) separately for movement and no-movement conditions (main effect of "temperature"  $F = 13.3$ ,  $p = 0.002$ , followed by post-hoc test;  $p = 0.03$  painful heat > painful cold,  $p = 0.001$  innocuous heat > innocuous cold). Carriers. No significant effects.
- g. Event related time-course. Contrast pain vs no-pain. (main effect of "pain",  $p < 0.001$ ).

#### Supplementary figure 2

Post-natal mortality of NGF<sup>R100W/R100W</sup> mice, log-rank Kaplan-Meier survival analysis (statistic value = 767.726,  $DF = 3$ ,  $p < 0.001$ ), followed by Bonferroni post-hoc test, \*\*\*  $p < 0.001$ .

#### Supplementary figure 3

- a. Hot plate latency, 6 months, ANOVA-2 ("genotype" x "temperature" interaction,  $F_{4,79} = 3.283$ ,  $p = 0.017$ ), followed by Bonferroni post-hoc test, \*\*\*  $p < 0.001$ , \*\*  $p = 0.003$ ; NGF<sup>m/m</sup>,  $n = 8$ ; NGF<sup>R100W/m</sup>,  $n = 8$ .
- b. Threshold to respond, 6 months, Student's two-tailed  $t$  test ( $t = 2.789$ ,  $p = 0.015$ ); NGF<sup>m/m</sup>,  $n = 8$ ; NGF<sup>R100W/m</sup>,  $n = 7$ .

#### Supplementary figure 4

- a. Tape removal test, 2 months, Student's two-tailed  $t$  test ( $t = 0.296$ ,  $p = 0.771$ ); NGF<sup>m/m</sup>,  $n = 6$ ; NGF<sup>R100W/m</sup>,  $n = 11$ ; 6 months, Student's two-tailed  $t$  test ( $t = 1.268$ ,  $p = 0.225$ ); NGF<sup>m/m</sup>,  $n = 8$ ; NGF<sup>R100W/m</sup>,  $n = 8$ .
- b. PGP9.5 immunofluorescence, hairy skin, 2 months, Student's two-tailed  $t$  test ( $t = 0.340$ ,  $p = 0.751$ ); NGF<sup>m/m</sup>,  $n = 3$ ; NGF<sup>R100W/m</sup>,  $n = 3$ ; 6 months, Student's two-tailed  $t$  test ( $t = 4.779$ ,  $p = 0.004$ ); NGF<sup>m/m</sup>,  $n = 4$ ; NGF<sup>R100W/m</sup>,  $n = 3$ .

#### Supplementary figure 5

DRG survival assay, ANOVA-1 ( $F_{2,17} = 8.621$ ,  $p = 0.003$ ), followed by Bonferroni post-hoc test, hNGF<sup>WT</sup> vs. control,  $p = 0.006$ ; hNGF<sup>R100W</sup> vs. control,  $p = 0.01$ ;  $n = 6$  for each group.

#### Supplementary figure 6

- a. NGF immunoprecipitation from HEK293 supernatant, ANOVA-1 ( $F_{5,24} = 23.529$ ,  $p < 0.001$ ) followed by Student-Newman-Keuls post-hoc test, \*\*\*  $p < 0.001$ , \*\*  $p < 0.01$ , \*  $p < 0.05$ ; NGF,  $n = 5$ ; hNGF<sup>WT</sup> 0.6  $\mu\text{g}$ ,  $n = 4$ ; hNGF<sup>R100W</sup> 0.6  $\mu\text{g}$ ,  $n = 5$ ; hNGF<sup>WT</sup> + hNGF<sup>R100W</sup> 0.3  $\mu\text{g}$ /each,  $n = 3$ ; hNGF<sup>WT</sup> 0.3  $\mu\text{g}$ ,  $n = 4$ ; hNGF<sup>R100W</sup> 0.3  $\mu\text{g}$ ,  $n = 5$ ; mock,  $n = 4$ .
- b. NGF immunoprecipitation from cerebral cortex, Student's two-tailed  $t$  test ( $t = 2.465$ ,  $p = 0.031$ ); NGF<sup>m/m</sup>,  $n = 6$ ; NGF<sup>R100W/m</sup>,  $n = 7$ .

#### Supplementary figure 7

Y maze test 2 months, Student's two-tailed  $t$ -test ( $t = 1.793$ ,  $p = 0.093$ ). NGF<sup>m/m</sup>,  $n = 5$ ; NGF<sup>R100W/m</sup>,  $n = 12$ . Y maze test 6 months, Student's two-tailed  $t$ -test ( $t = 1.074$ ,  $p = 0.332$ ). NGF<sup>m/m</sup>,  $n = 3$ ; NGF<sup>R100W/m</sup>,  $n = 4$ .

#### Supplementary figure 8

- a. Elevated plus maze, 2 months, Student's two-tailed  $t$  test ( $t = 2.182$ ,  $p = 0.788$ ); NGF<sup>m/m</sup>,  $n = 4$ ; NGF<sup>R100W/m</sup>,  $n = 11$ ; 6 months, Student's two-tailed  $t$ -test ( $t = 5.431$ ,  $p = 0.003$ ); NGF<sup>m/m</sup>,  $n = 3$ ; NGF<sup>R100W/m</sup>,  $n = 4$ ).
- b. Marble burying test, 2 months, Student's two-tailed  $t$  test ( $t = 1.374$ ,  $p = 0.212$ ); NGF<sup>m/m</sup>,  $n = 4$ ; NGF<sup>R100W/m</sup>,  $n = 5$ ; 6 months, Student's two-tailed  $t$  test ( $t = 2.357$ ,  $p = 0.043$ ); NGF<sup>m/m</sup>,  $n = 4$ ; NGF<sup>R100W/m</sup>,  $n = 7$ .
- c. Nest building test, 2 months, Student's two-tailed  $t$  test ( $t = 1.038$ ,  $p = 0.334$ ); NGF<sup>m/m</sup>,  $n = 4$ ; NGF<sup>R100W/m</sup>,  $n = 5$ ; 6 months, Student's two-tailed  $t$  test ( $t = 2.482$ ,  $p = 0.035$ ); NGF<sup>m/m</sup>,  $n = 4$ ; NGF<sup>R100W/m</sup>,  $n = 7$ .

#### Supplementary figure 9

Three-chamber test, sociability session, ANOVA-2 (main effect of "condition",  $F_{1,21} = 15.982$ ,  $p < 0.001$ ); NGF<sup>h/m</sup>,  $n = 4$ ; NGF<sup>R100W/m</sup>,  $n = 7$ .

#### Supplementary figure 10

Plasma oxytocin ELISA, Student's two-tailed  $t$  test ( $t = 2.670$ ,  $p = 0.020$ ); NGF<sup>h/m</sup>,  $n = 5$ ; NGF<sup>R100W/m</sup>,  $n = 9$ .
